# Supplementary material for: Neurotoxin Impurities: A Review of Threats to Efficacy
Source: PubMed Central journal article supplement — Plast Reconstr Surg Glob Open. 2020 Jan 24;8(1):e2627. doi: 10.1097/GOX.0000000000002627 (PMC7015620; doi:10.1097/gox.0000000000002627), 2020-01-24

### Amplification Curves

Select Zoom

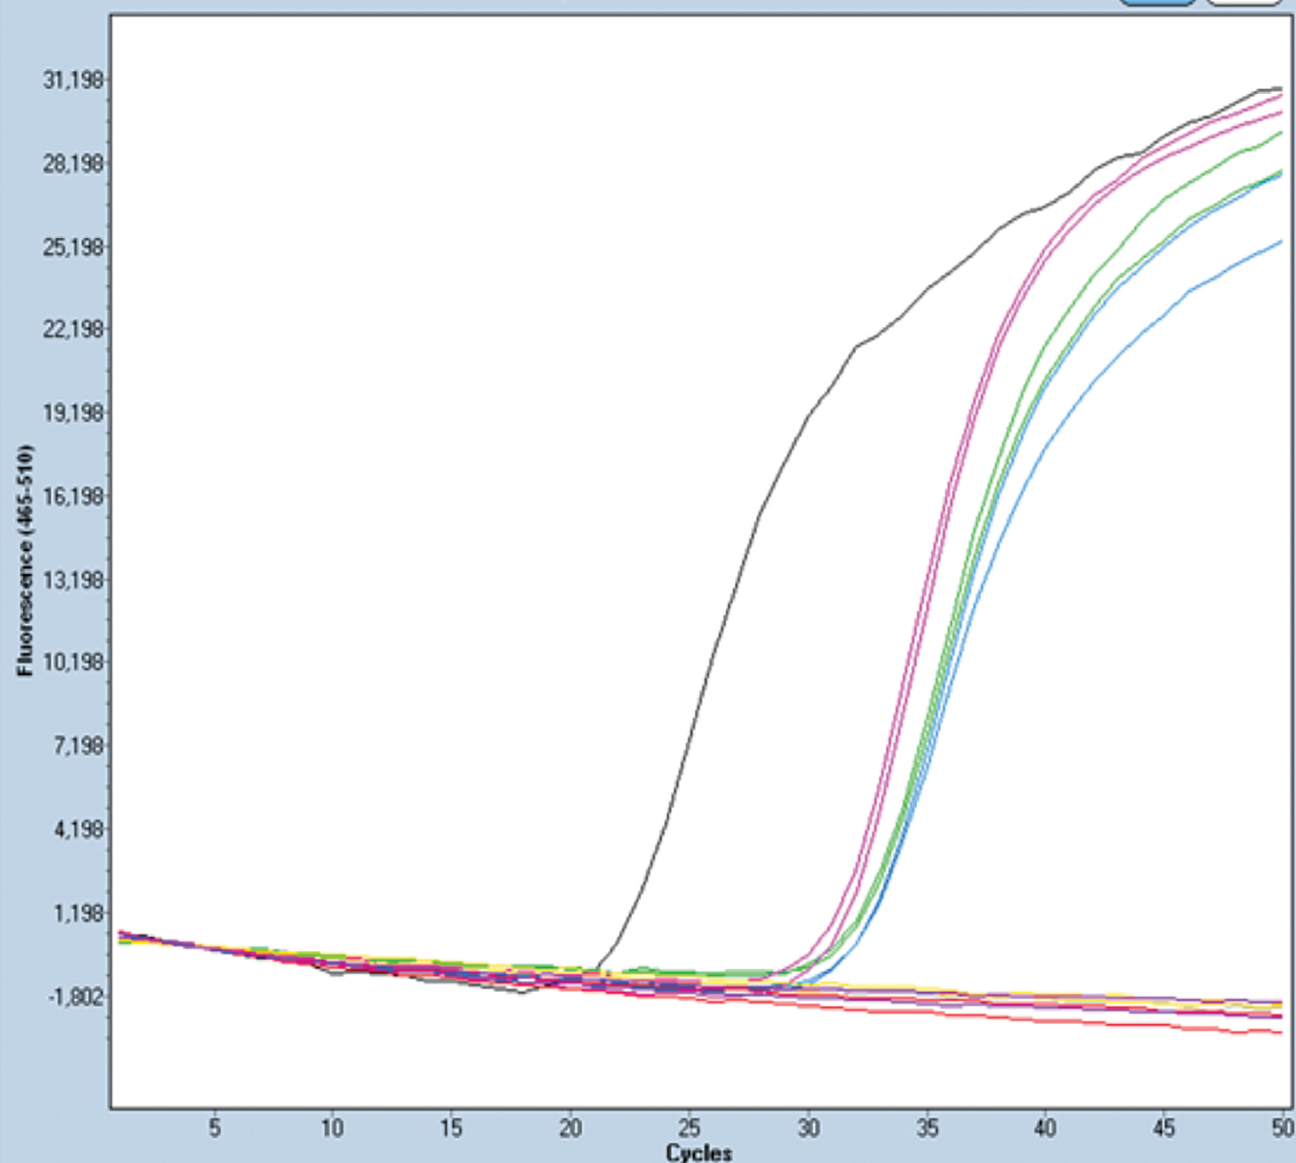

|                                                              |                                                                 |                                                              |                                                              |
|--------------------------------------------------------------|-----------------------------------------------------------------|--------------------------------------------------------------|--------------------------------------------------------------|
| <span style="color: black;">■</span> A1 PCR positive control | <span style="color: green;">■</span> E1 Onabot batch C3374 C3   | <span style="color: red;">■</span> A2 Incobot batch 21140    | <span style="color: purple;">■</span> E2 Incobot batch 20317 |
| <span style="color: grey;">■</span> B1 PCR negative control  | <span style="color: green;">■</span> F1 Onabot batch C3374 C3   | <span style="color: red;">■</span> B2 Incobot batch 21140    | <span style="color: purple;">■</span> F2 Incobot batch 20317 |
| <span style="color: blue;">■</span> C1 Onabot batch C2525 C3 | <span style="color: magenta;">■</span> G1 Onabot batch C0919 C2 | <span style="color: yellow;">■</span> C2 Incobot batch 21141 |                                                              |
| <span style="color: blue;">■</span> D1 Onabot batch C2525 C3 | <span style="color: magenta;">■</span> H1 Onabot batch C0919 C2 | <span style="color: yellow;">■</span> D2 Incobot batch 21141 |                                                              |

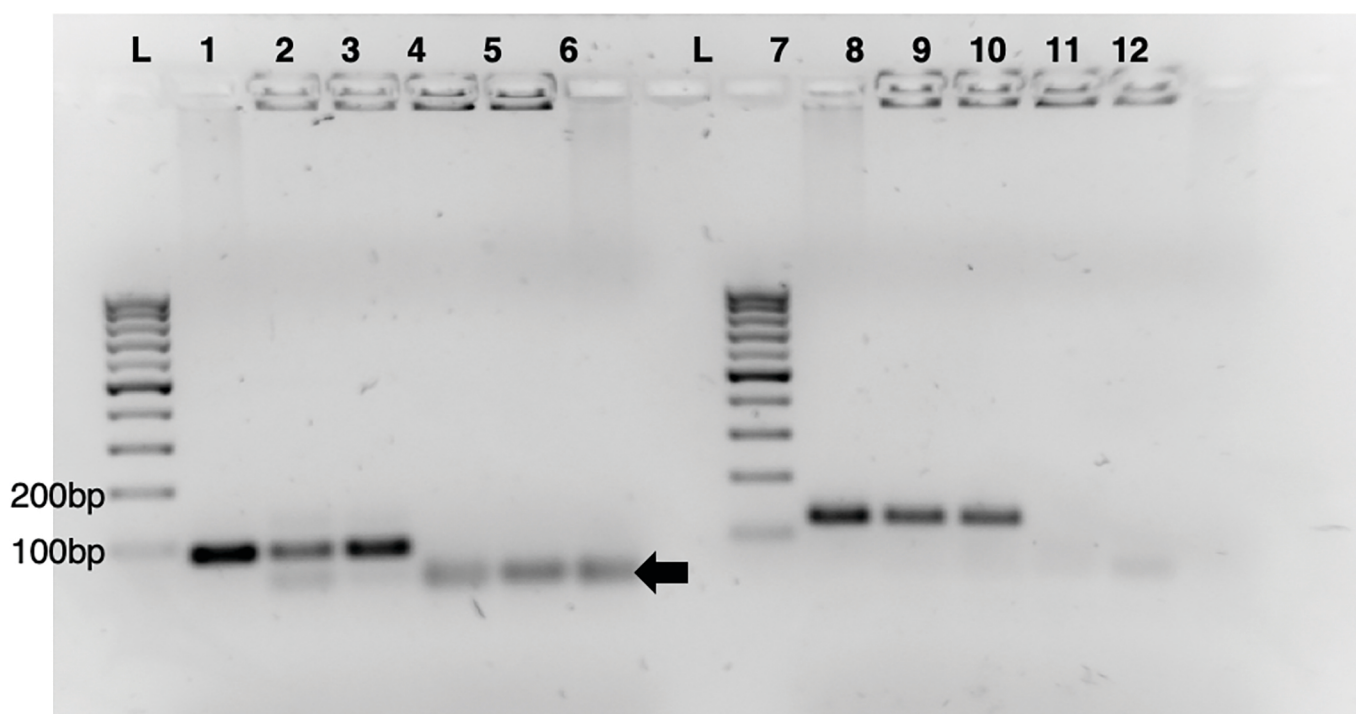

Supplement: gox-8-e2627-s001.pdf [file gox-8-e2627-s001.pdf]
